# Supplementary material for: Steam reforming of methanol over oxide decorated nanoporous gold catalysts: a combined in situ FTIR and flow reactor study
Source: Royal Society of Chemistry journal article supplement (doi:10.1039/c6cp08849j), 2017-01-01

## Supporting Information

### **Steam Reforming of Methanol over Oxide decorated Nanoporous Gold Catalysts: A Combined In-situ FTIR and Flow Reactor Study**

J. Shi<sup>a</sup>, C. Mahr<sup>b</sup>, M. M. Murshed<sup>c</sup>, T. M. Gesing<sup>c</sup>, A. Rosenauer<sup>b</sup>, M. Bäumer<sup>a</sup>, A. Wittstock<sup>a\*</sup>

*<sup>a</sup>Institute of Applied and Physical Chemistry and Center for Environmental Research and Sustainable Technology, University Bremen, Leobener Str. UFT, 28359 Bremen, Germany*

*<sup>b</sup>Institute of Solid State Physics, University Bremen, Bremen, Germany*

*<sup>c</sup>Solid State Chemical Crystallography, Institute of Inorganic Chemistry and Crystallography/FB02, University Bremen, Leobener Str. NW 2, 28359, Bremen, Germany*

\*Corresponding author: [awittstock@uni-bremen.de](mailto:awittstock@uni-bremen.de)

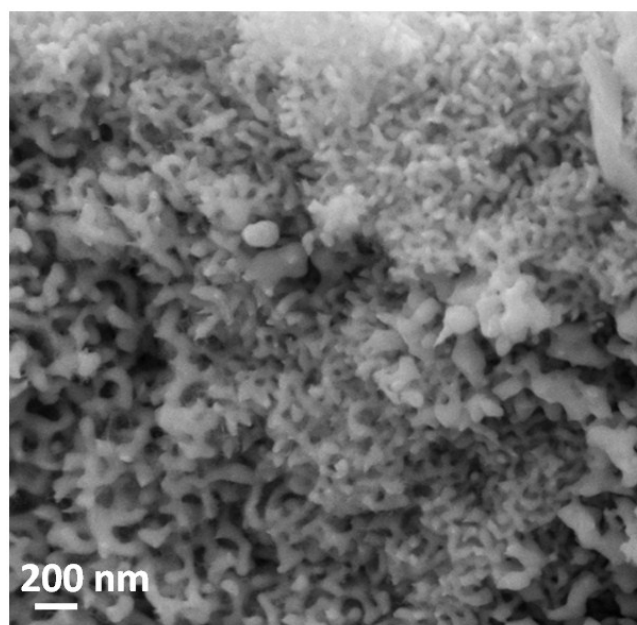

Figure S1. SEM of the cross section of a  $\text{CeO}_x/\text{npAu}$  disk ( $\sim 150\ \mu\text{m}$  thick) before SRM testing

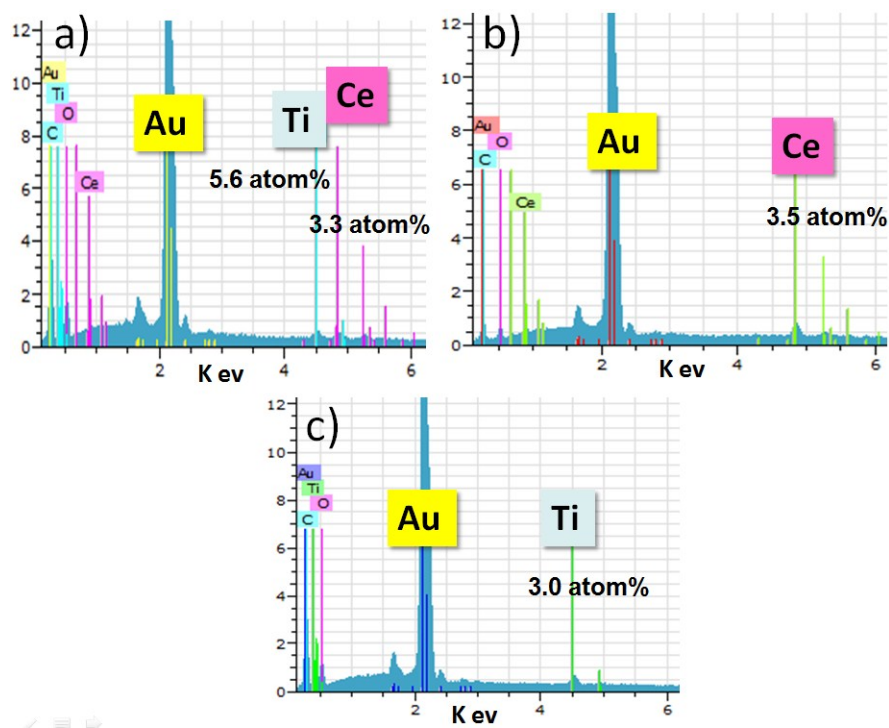

Figure S2. EDX measurement from three samples a)  $\text{Ce}_1\text{Ti}_2\text{O}_x/\text{npAu}$  b)  $\text{CeO}_x/\text{npAu}$  c)  $\text{TiO}_x/\text{npAu}$ .

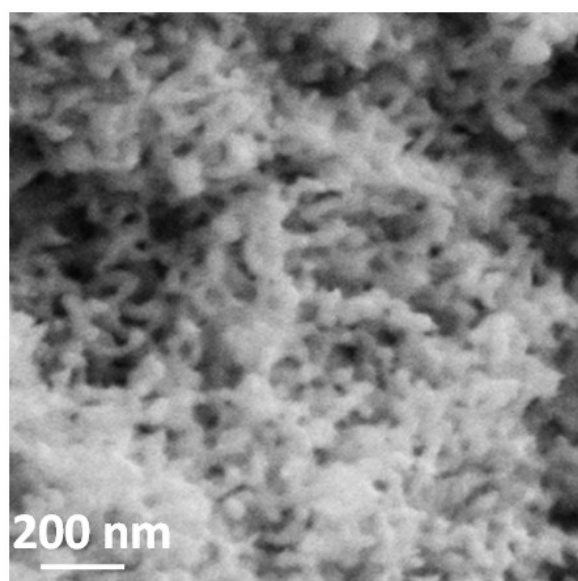

Figure S3. SEM of the cross section of a  $\text{TiO}_x/\text{npAu}$  disk ( $\sim 150\ \mu\text{m}$  thick, from the middle part) after 5h annealing treatment at  $450^\circ\text{C}$  in air.

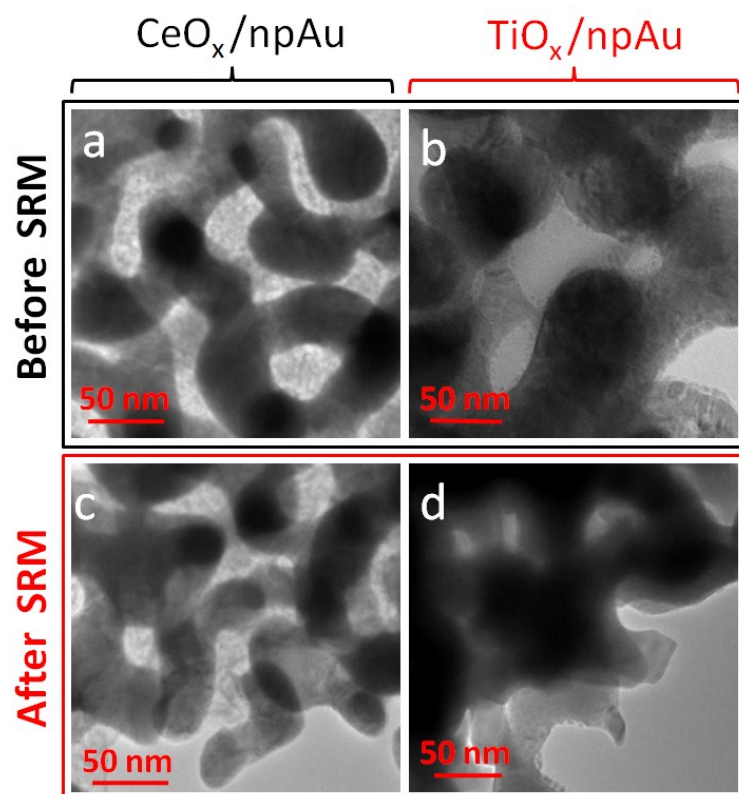

Fig. S4. a/b) TEM images of nanoporous gold modified by ceria oxides ( $\text{CeO}_x/\text{npAu}$ ) and titania ( $\text{TiO}_x/\text{npAu}$ ) after calcination at 450°C in helium for 2h; c/d) TEM after SRM testing.

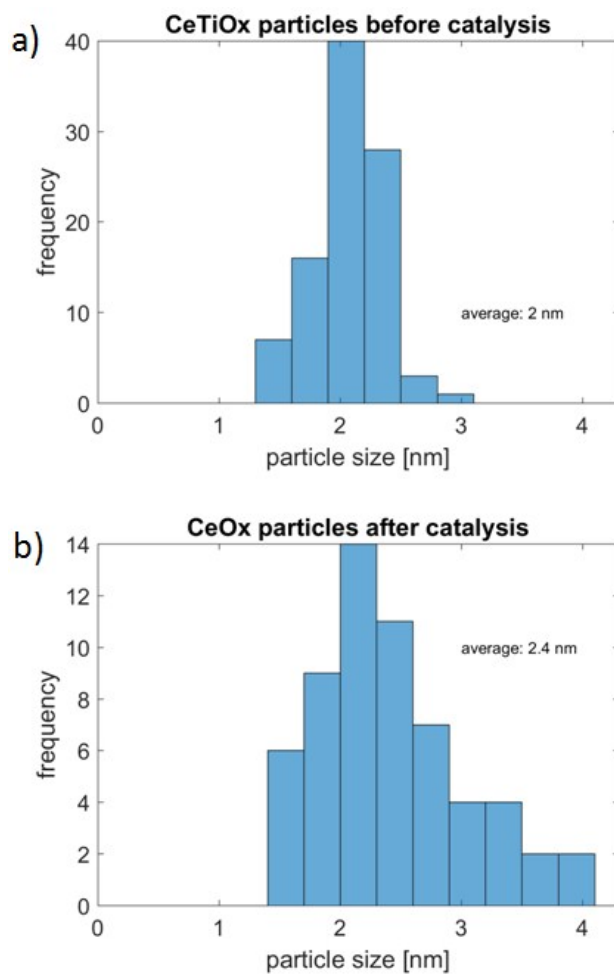

Fig. S5. Histogram for the oxide nanoparticles on npAu a) CeTiO<sub>x</sub> particles before catalysis b) CeO<sub>x</sub> particles after catalysis

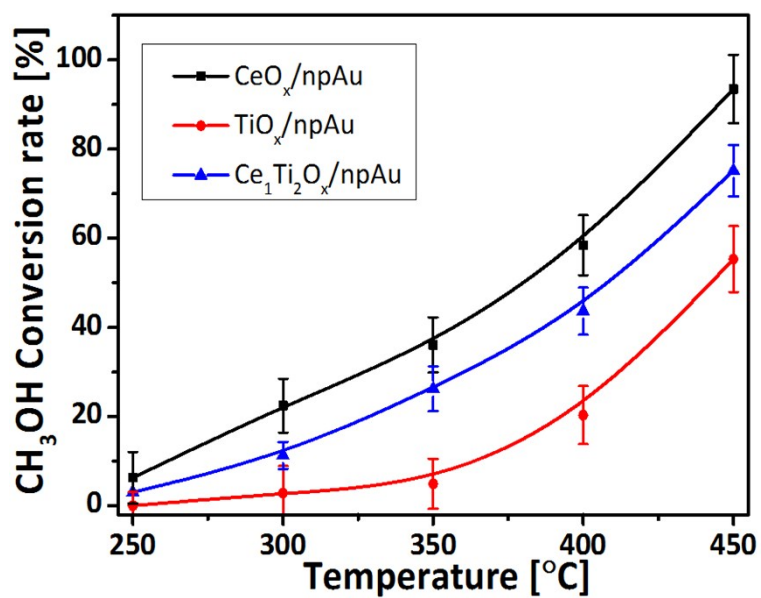

Fig. S6. CH<sub>3</sub>OH conversion rate (%) in steady-state tests of steam reforming of

methanol over  $\text{Ce}_1\text{Ti}_2\text{O}_x/\text{npAu}$ ,  $\text{CeO}_x/\text{npAu}$  and  $\text{TiO}_x/\text{npAu}$ .

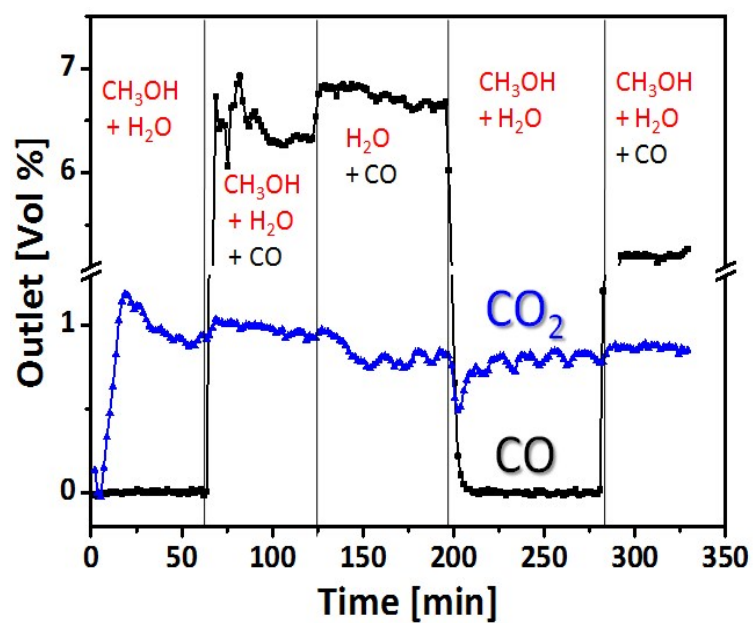

Fig. S7. Effect of the addition/removal of carbon monoxide in the reaction gas mixture over  $\text{CeO}_x/\text{npAu}$  operating at steady-state SRM at  $300^\circ\text{C}$ , 2.0 vol%  $\text{CH}_3\text{OH}$ , 20.0 vol%  $\text{H}_2\text{O}$ , total flow rate 35 mL/min;  $\text{GHSV} = 350,000 \text{ mL h}^{-1} \text{g}^{-1}_{\text{cat}}$ .

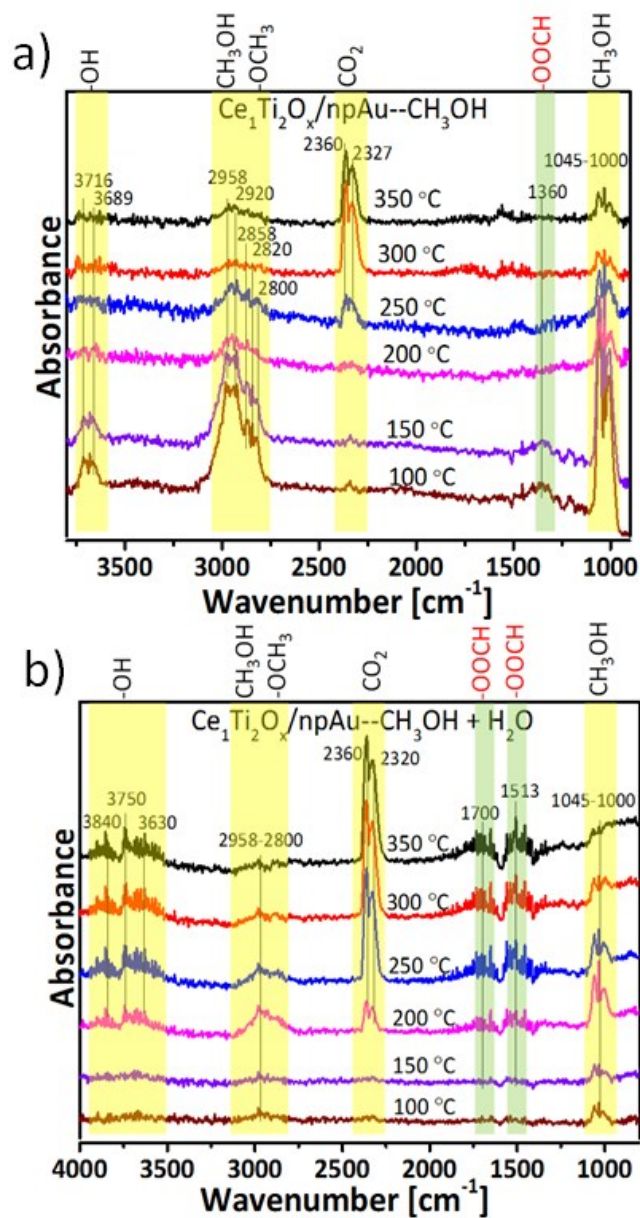

Fig. S8. In-situ DRIFT spectra recorded for  $\text{Ce}_1\text{Ti}_2\text{O}_x/\text{npAu}$  catalysts between 100°C and 350°C (flow rate of 30 mL/min). (a) exposure to  $\text{CH}_3\text{OH}$  (13 vol%), (d) exposure to  $\text{CH}_3\text{OH}$  (1.3 vol%) and  $\text{H}_2\text{O}$  (2.0 vol%).

#### The formate pathway

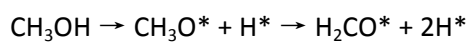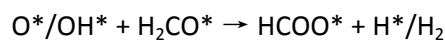

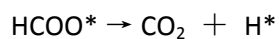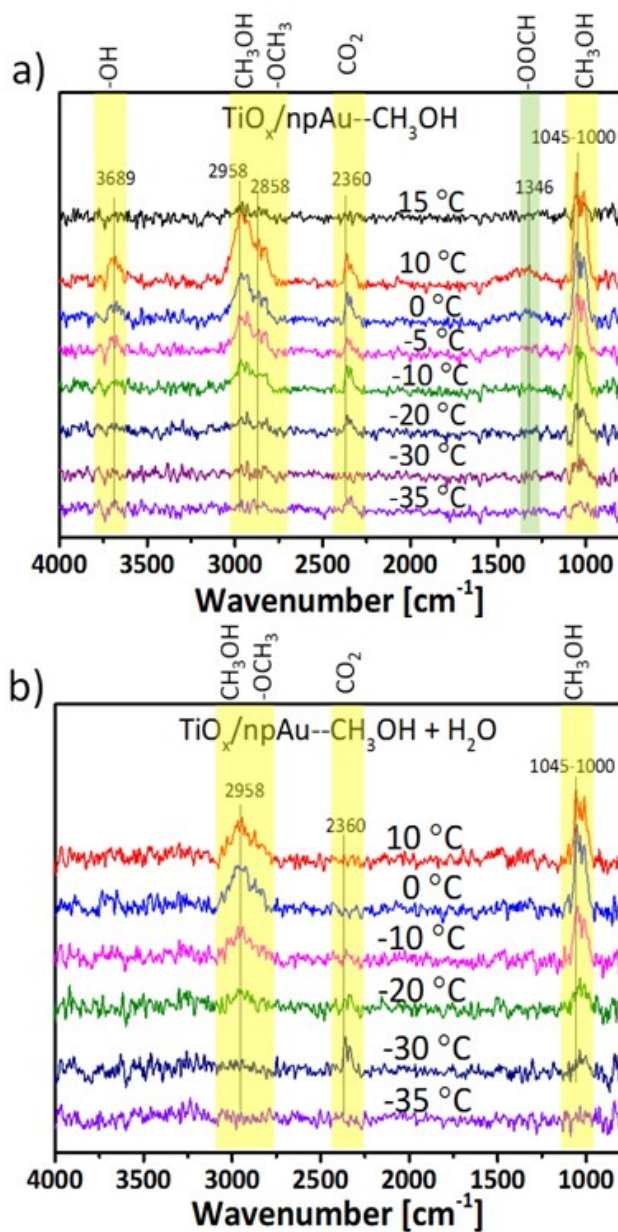

Fig. S9: Low temperature in-situ DRIFT spectra under He atmosphere (30 mL/min) for the  $\text{TiO}_x/\text{npAu}$  catalyst (a) after exposure to only  $\text{CH}_3\text{OH}$  and (b) after exposure to  $\text{CH}_3\text{OH}$  and  $\text{H}_2\text{O}$  at  $-35^\circ\text{C}$ .

#### Methyl formate pathway

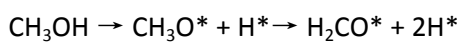

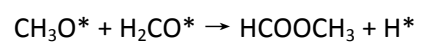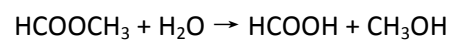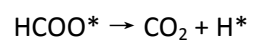

Supplement: c6cp08849j1.pdf [file c6cp08849j1.pdf]
